# Supplementary material for: Antiaromaticity–aromaticity transition of cyclo[16]carbon upon metal encapsulation
Source: Royal Society of Chemistry journal article supplement (doi:10.1039/d0cp06256a), 2021-01-01
Supplement: d0cp06256a1.pdf [file d0cp06256a1.pdf]

## Supplementary Information

# Antiaromaticity-aromaticity transition of cyclo[16]carbon upon metal encapsulation

Yuhang Jiang, Yabei Wu, Jianjun Deng, Zhiyong Wang,\*

<sup>a</sup> Department of Chemistry, Renmin University of China, Beijing 100872, PR China

\*E-mail: zhiyongwang@ruc.edu.cn.

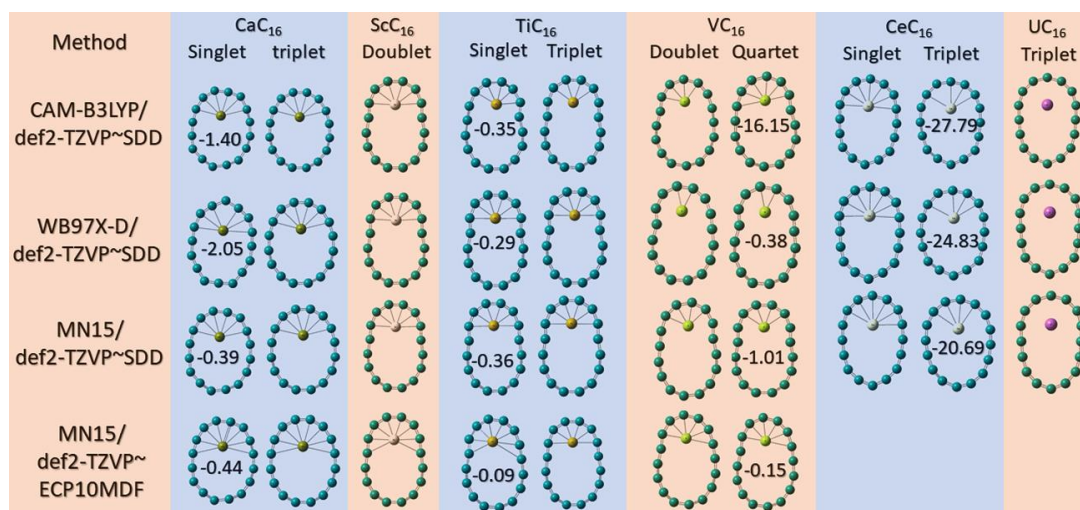

**Figure S1.** The optimized geometric structures of  $\text{CaC}_{16}$ ,  $\text{ScC}_{16}$ ,  $\text{TiC}_{16}$ ,  $\text{VC}_{16}$ ,  $\text{CeC}_{16}$  and  $\text{UC}_{16}$  at different theory levels. The def2-TZVP basis set was used for C, Ca, Sc, Ti and V atoms. The SDD basis sets, i.e. ECP28MWB and ECP60MWB, were used for Ce and U atoms, respectively. In addition, ECP10MDF was also employed for Ca, Sc, Ti and V atoms to evaluate the relativistic effects. The energy difference between the structures with different multiplicities is given in kcal/mol.

**Table S1.** Theoretically calculated binding energy ( $\Delta E_b$ , in kcal/mol) of  $\text{CaC}_{16}$ ,  $\text{ScC}_{16}$ ,  $\text{TiC}_{16}$ ,  $\text{VC}_{16}$ ,  $\text{CeC}_{16}$  and  $\text{UC}_{16}$  by using different functionals. The def2-TZVP basis set was used for C, Ca, Sc, Ti and V atoms. The SDD basis sets, i.e. ECP28MWB and ECP60MWB, were used for Ce and U atoms, respectively. In addition, ECP10MDF was also employed for Ca, Sc, Ti and V atoms to evaluate the relativistic effects.

| Methods                 | MN15       | MN15    | CAM-B3LYP | wB97X-D |
|-------------------------|------------|---------|-----------|---------|
|                         | (ECP10MDF) |         |           |         |
| <b>CaC<sub>16</sub></b> | -63.63     | -59.36  | -57.15    | -65.42  |
| <b>ScC<sub>16</sub></b> | -63.23     | -95.57  | -82.84    | -93.32  |
| <b>TiC<sub>16</sub></b> | -97.36     | -129.05 | -81.06    | -90.45  |
| <b>VC<sub>16</sub></b>  | -86.02     | -96.58  | -57.69    | -67.24  |
| <b>CeC<sub>16</sub></b> | -67.29     | -       | -134.12   | -147.27 |
| <b>UC<sub>16</sub></b>  | -118.15    | -       | -129.24   | -129.64 |

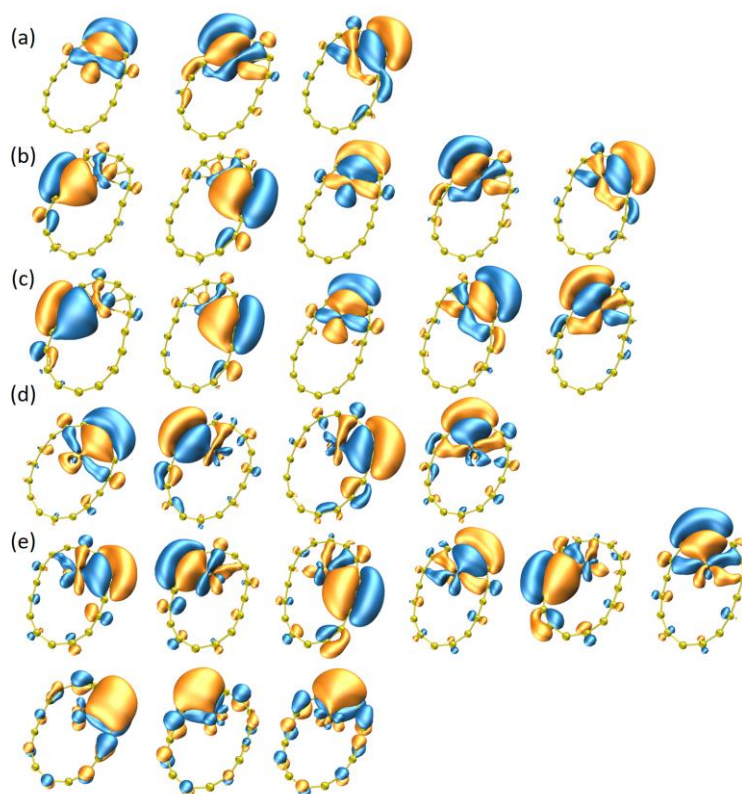

**Figure S2.** The isosurface map of localized molecular orbitals (LMOs) of (a)  $\text{ScC}_{16}$ , (b)  $\text{TiC}_{16}$ , (c)  $\text{VC}_{16}$ , (d)  $\text{CeC}_{16}$  and (e)  $\text{UC}_{16}$ . Only those LMOs with obvious overlap between metal and carbon atoms were listed for clarity.

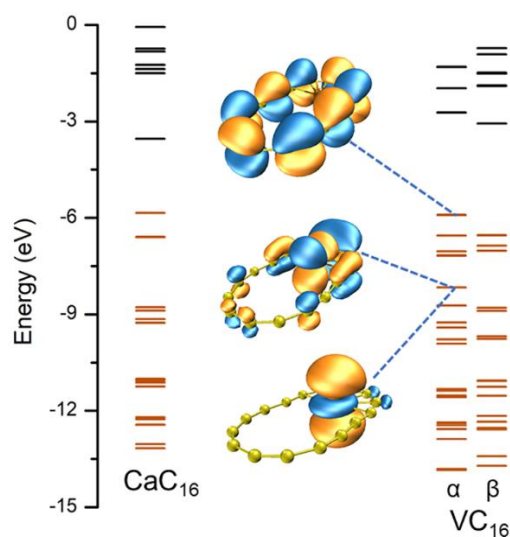

**Figure S3.** The energy diagram of  $\text{CaC}_{16}$  and  $\text{VC}_{16}$ . The energy level of the occupied and unoccupied CMOs are denoted in red and black, respectively. The molecular orbitals shown in the left of the energy diagram correspond to the unpaired electrons.

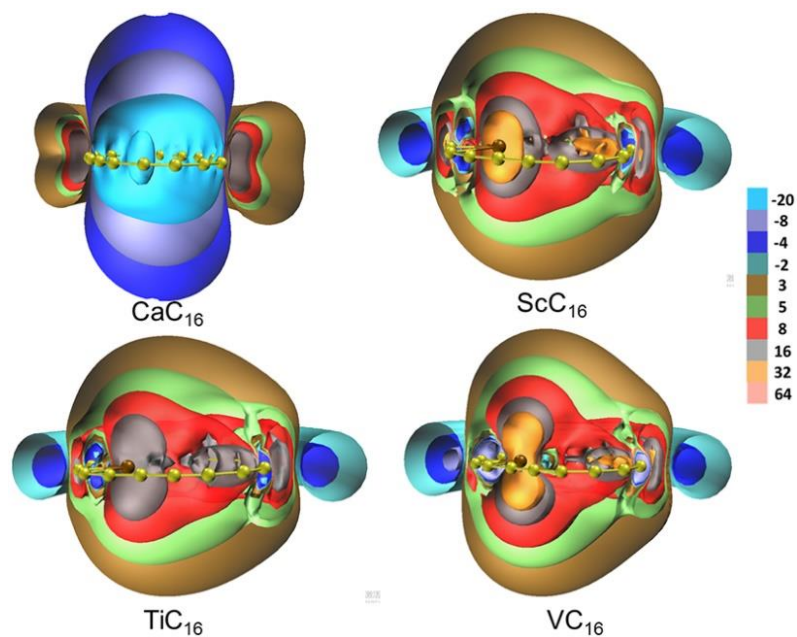

**Figure S4.** Multiple clipped isosurfaces of ICSS<sub>zz</sub> of MC<sub>16</sub> (M = Ca, Ti, Sc, V) calculated at MN15/def2-TZVP~ECP10MDF level of theory.

**Table S2.** The magnetically induced current intensities (in nA/T) passing through each C-C bond in MC<sub>16</sub> (M = Ca, Ti, Sc, V, Ce, U) calculated by using the MN15 functional. The def2-TZVP basis set was used for C, Ca, Sc, Ti and V atoms. The SDD basis sets, i.e. ECP28MWB and ECP60MWB, were used for Ce and U atoms, respectively. Note that “R” represents that the data were obtained at MN15/def2-TZVP~ECP10MDF level of theory.

| <b>Bond</b>  | <b>CaC<sub>16</sub></b> |        | <b>ScC<sub>16</sub></b> |      | <b>TiC<sub>16</sub></b> |       | <b>VC<sub>16</sub></b> |       | <b>CeC<sub>16</sub></b> | <b>UC<sub>16</sub></b> |
|--------------|-------------------------|--------|-------------------------|------|-------------------------|-------|------------------------|-------|-------------------------|------------------------|
| <b>Index</b> | -                       | R      | -                       | R    | -                       | R     | -                      | R     | -                       | -                      |
| 1            | -25.33                  | -24.1  | 6.47                    | 7.13 | 9.60                    | 8.62  | 9.15                   | 7.46  | 2.75                    | 59.68                  |
| 2            | -24.49                  | -23.34 | 8.76                    | 8.85 | 10.34                   | 9.88  | 11.41                  | 9.23  | 3.96                    | 58.47                  |
| 3            | -24.51                  | -23.32 | 9.17                    | 9.36 | 10.15                   | 10.07 | 13.16                  | 12.35 | 5.11                    | 59.66                  |
| 4            | -25.25                  | -23.9  | 8.22                    | 8.62 | 10.36                   | 10.91 | 13.79                  | 13.48 | 5.04                    | 58.90                  |
| 5            | -25.78                  | -24.47 | 8.99                    | 9.27 | 10.00                   | 10.09 | 12.68                  | 12.44 | 4.68                    | 58.9                   |

|    |        |        |      |      |       |      |       |       |      |       |
|----|--------|--------|------|------|-------|------|-------|-------|------|-------|
| 6  | -25.66 | -24.33 | 8.29 | 8.67 | 10.22 | 9.88 | 11.33 | 12.25 | 5.06 | 59.68 |
| 7  | -24.78 | -23.33 | 9.16 | 9.34 | 9.68  | 8.65 | 9.09  | 9.29  | 5.02 | 58.39 |
| 8  | -25.10 | -23.93 | 8.79 | 8.86 | 6.86  | 6.92 | 6.38  | 6.35  | 4.74 | 59.72 |
| 9  | -25.82 | -24.59 | 6.45 | 7.12 | 8.42  | 8.04 | 7.33  | 7.70  | 3.77 | 61.87 |
| 10 | -25.11 | -24.18 | 7.79 | 8.89 | 8.50  | 8.64 | 7.76  | 8.24  | 2.75 | 64.07 |
| 11 | -24.88 | -23.36 | 8.48 | 9.19 | 7.76  | 7.82 | 7.04  | 8.06  | 3.46 | 64.3  |
| 12 | -24.60 | -24.25 | 7.61 | 8.29 | 8.36  | 8.46 | 7.69  | 8.2   | 3.72 | 64.52 |
| 13 | -24.91 | -23.84 | 8.20 | 8.89 | 7.76  | 7.84 | 7.06  | 7.95  | 3.36 | 64.46 |
| 14 | -25.10 | -24.66 | 7.51 | 8.31 | 8.50  | 8.65 | 7.77  | 8.36  | 3.82 | 64.31 |
| 15 | -24.80 | -23.47 | 8.48 | 9.19 | 7.82  | 7.88 | 7.18  | 7.72  | 3.51 | 63.99 |
| 16 | -25.31 | -23.80 | 7.57 | 8.24 | 6.56  | 6.62 | 6.38  | 7.33  | 3.10 | 61.74 |

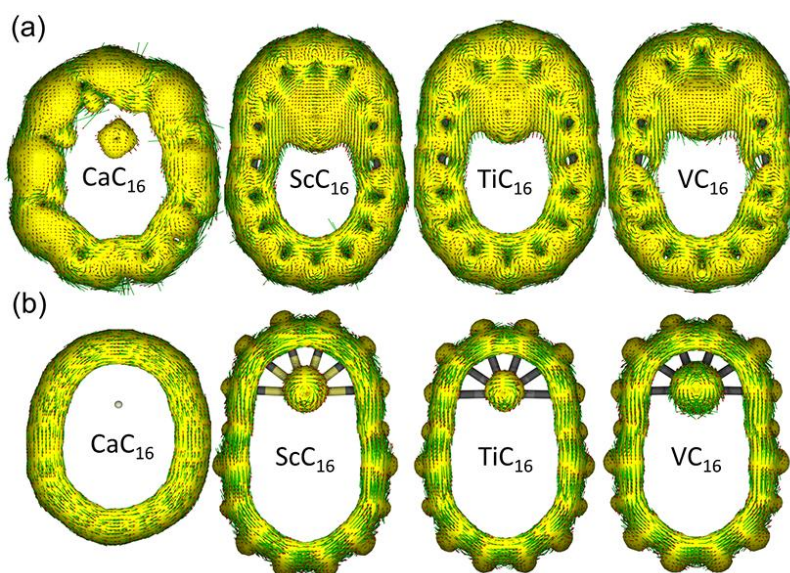

**Figure S5.** Anisotropy of the current-induced density (ACID) isosurface of  $MC_{16}$  ( $M = Ca, Ti, Sc, V$ ) contributed by (a)  $\pi_{in}$  and (b)  $\pi_{out}$  orbitals calculated at MN15/def2-TZVP~ECP10MDF level of theory.

**High-Resolution ACID plots:**

$C_{16}$ :

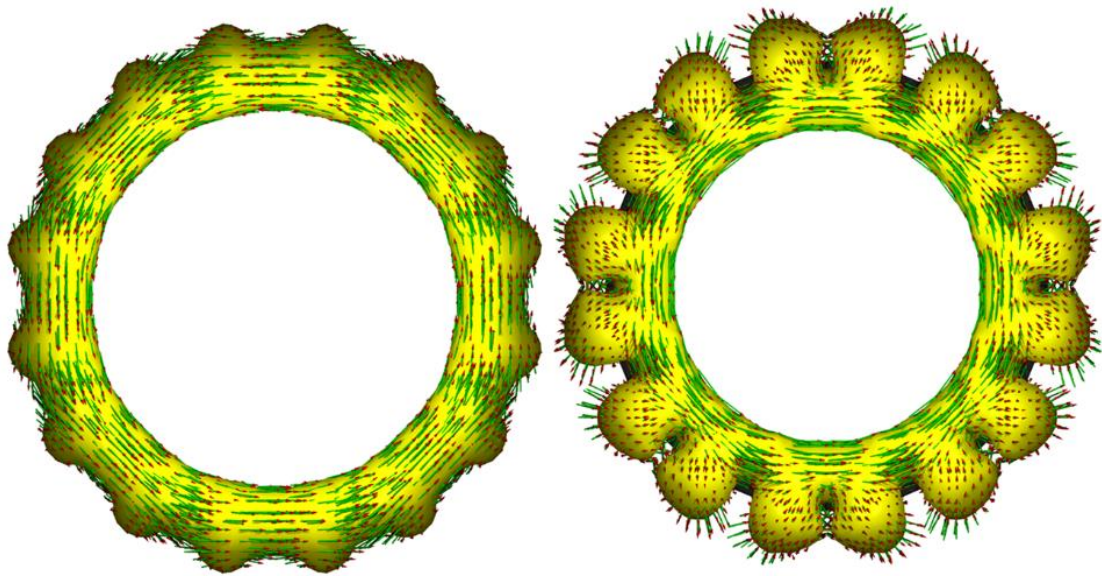

$CaC_{16}$ :

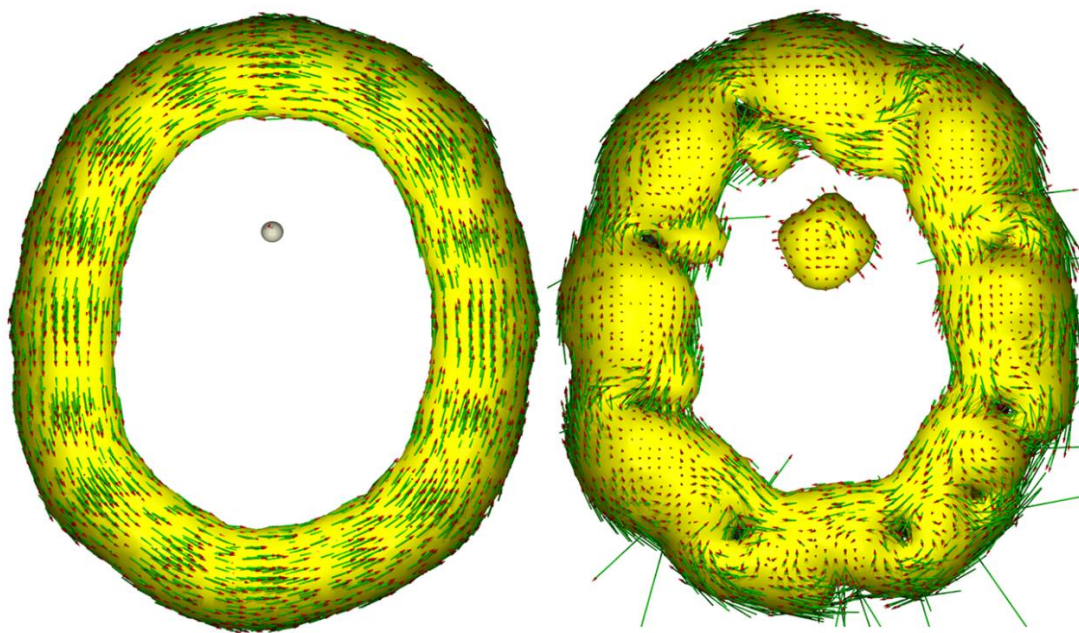

ScC<sub>16</sub>:

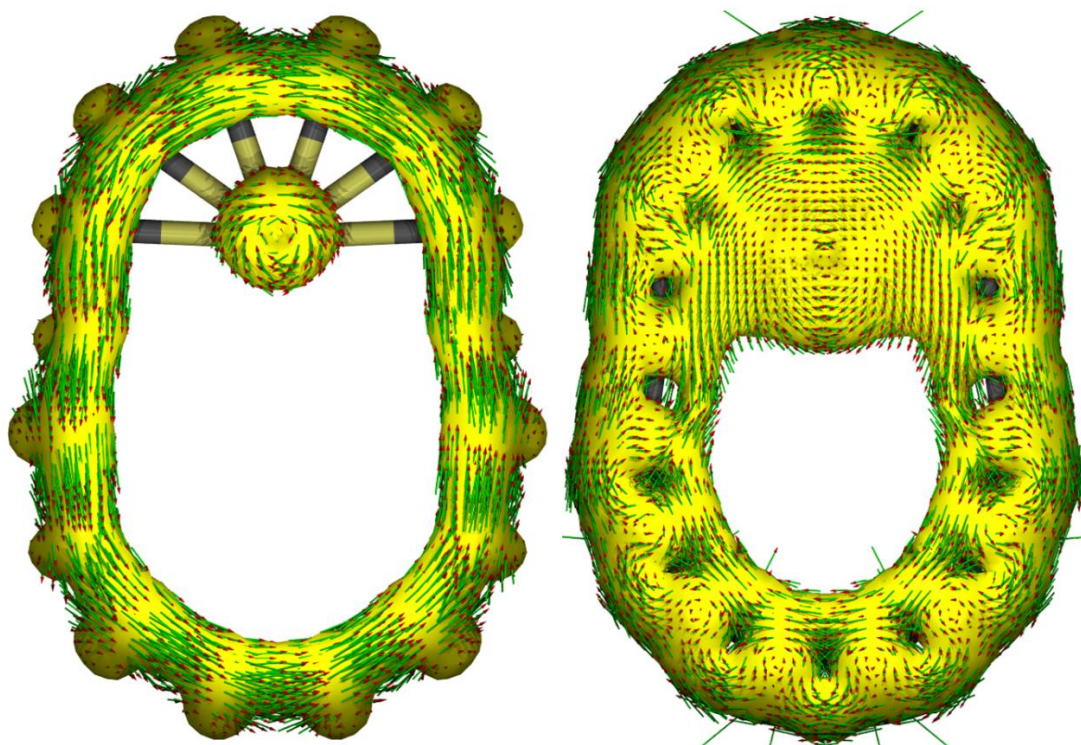

TiC<sub>16</sub>:

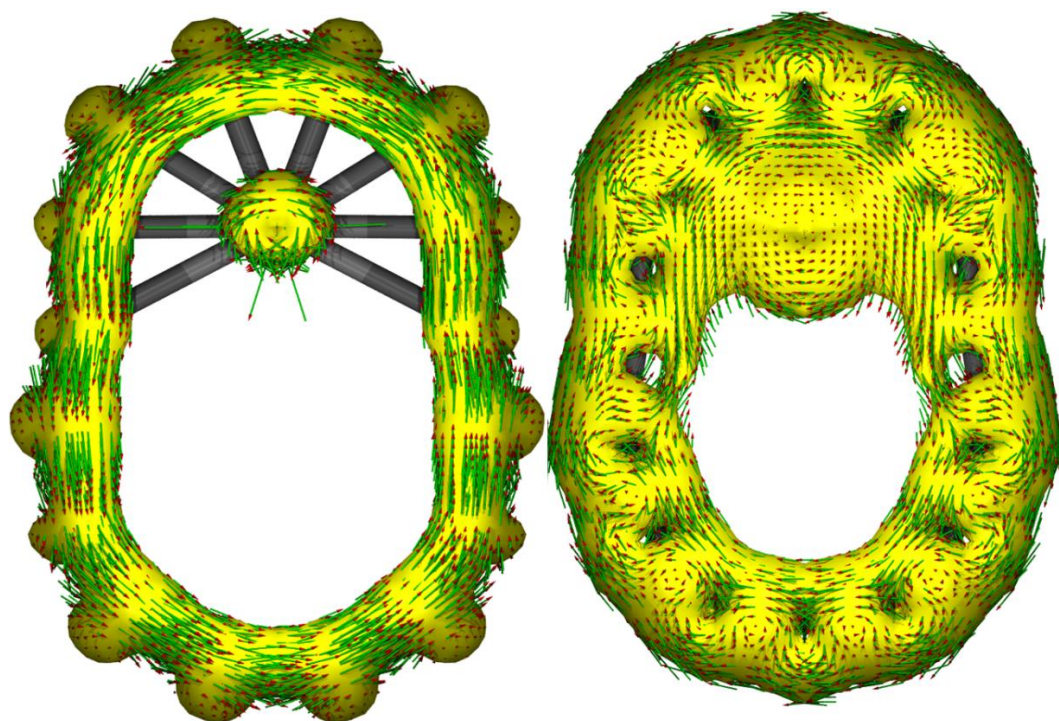

VC<sub>16</sub>:

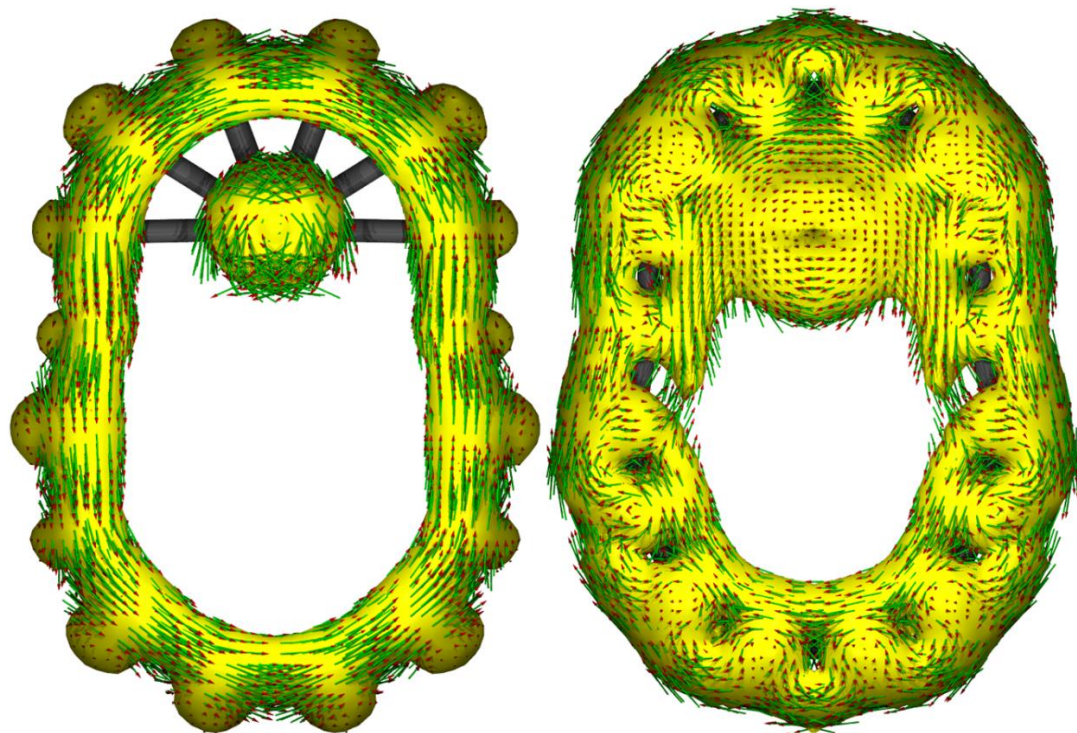

CeC<sub>16</sub>:

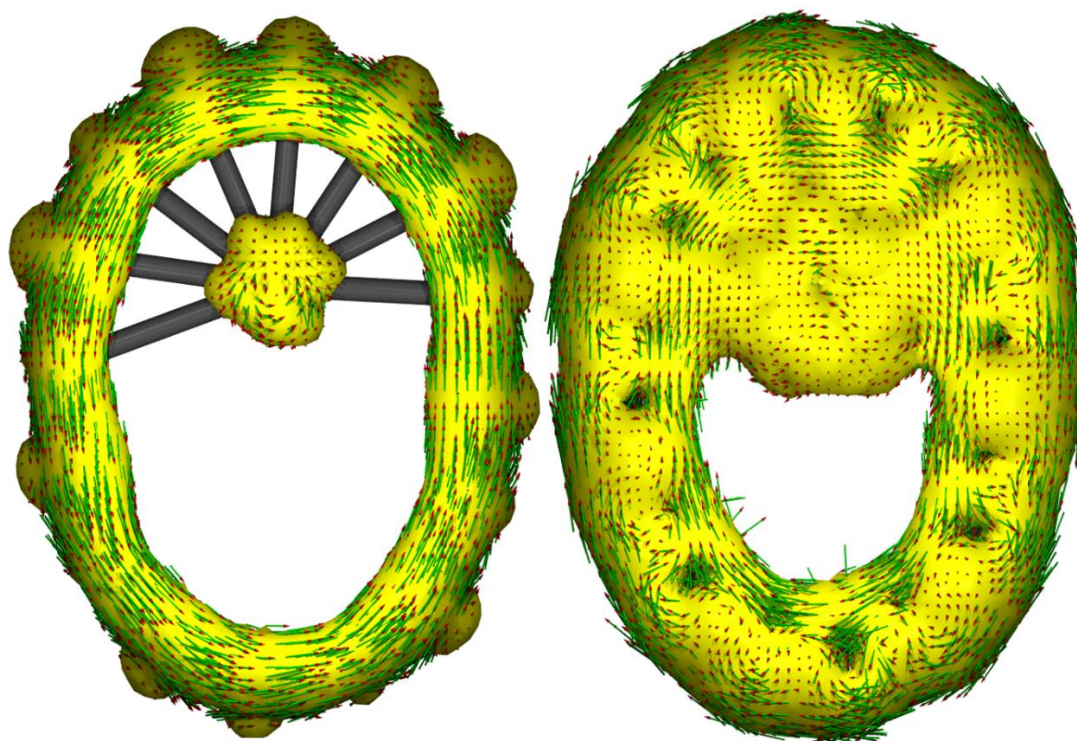



UC<sub>16</sub>:

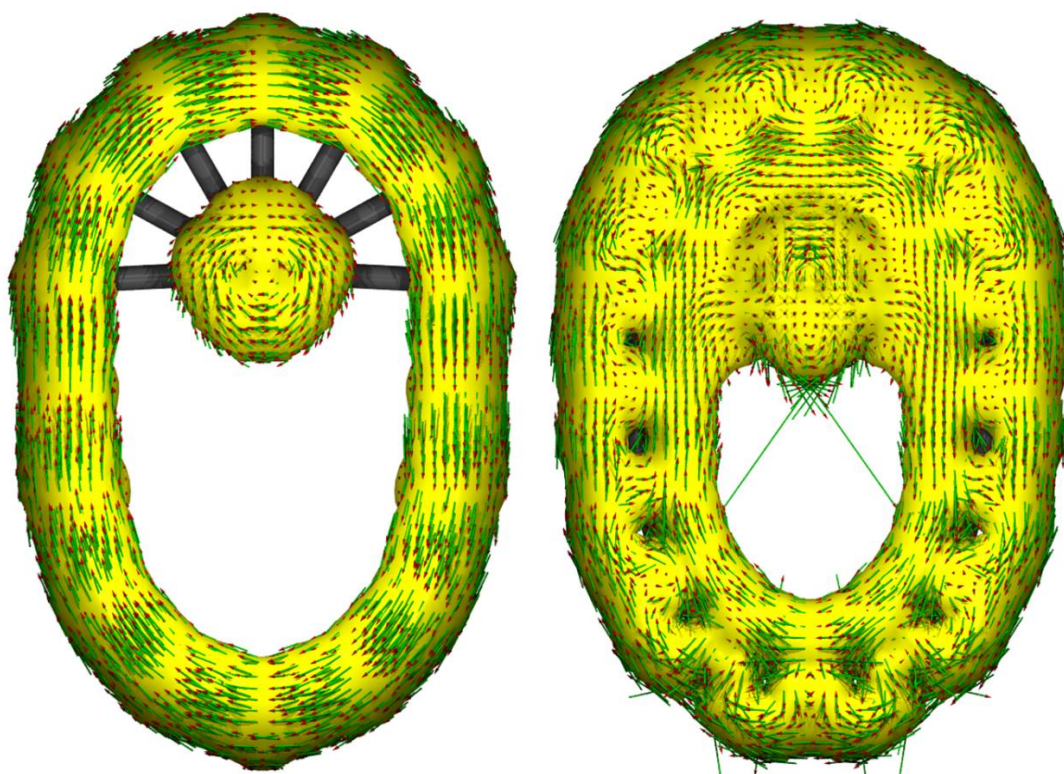

**CaC<sub>16</sub>: (ECP10MDF basis set for Ca)**

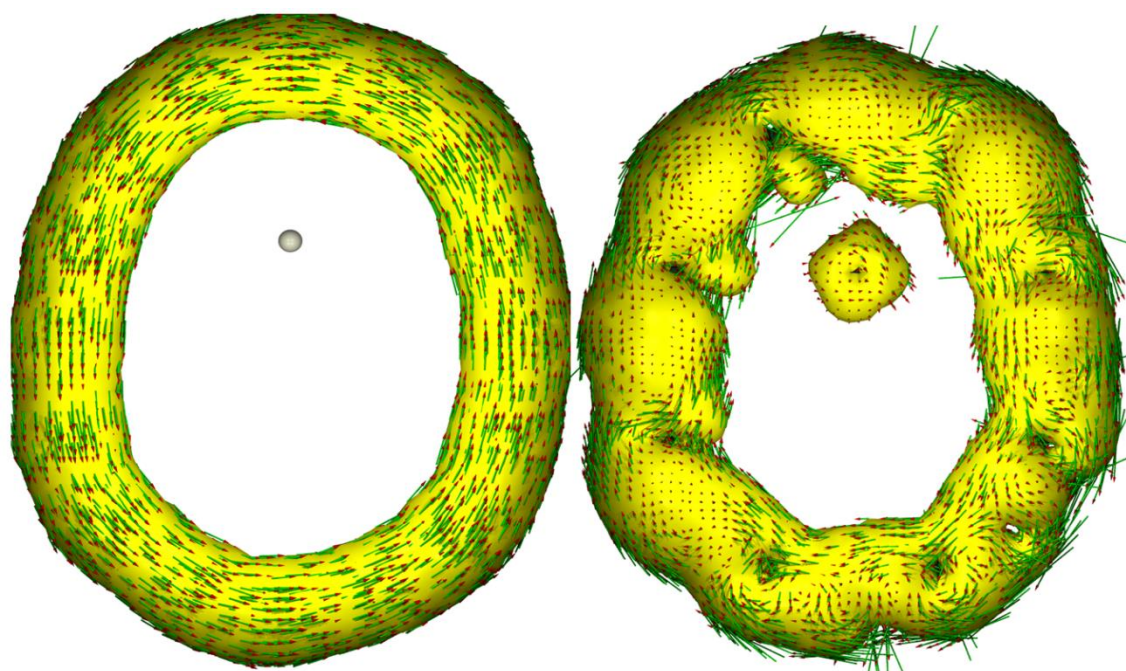

**ScC<sub>16</sub>: (ECP10MDF basis set for Sc)**

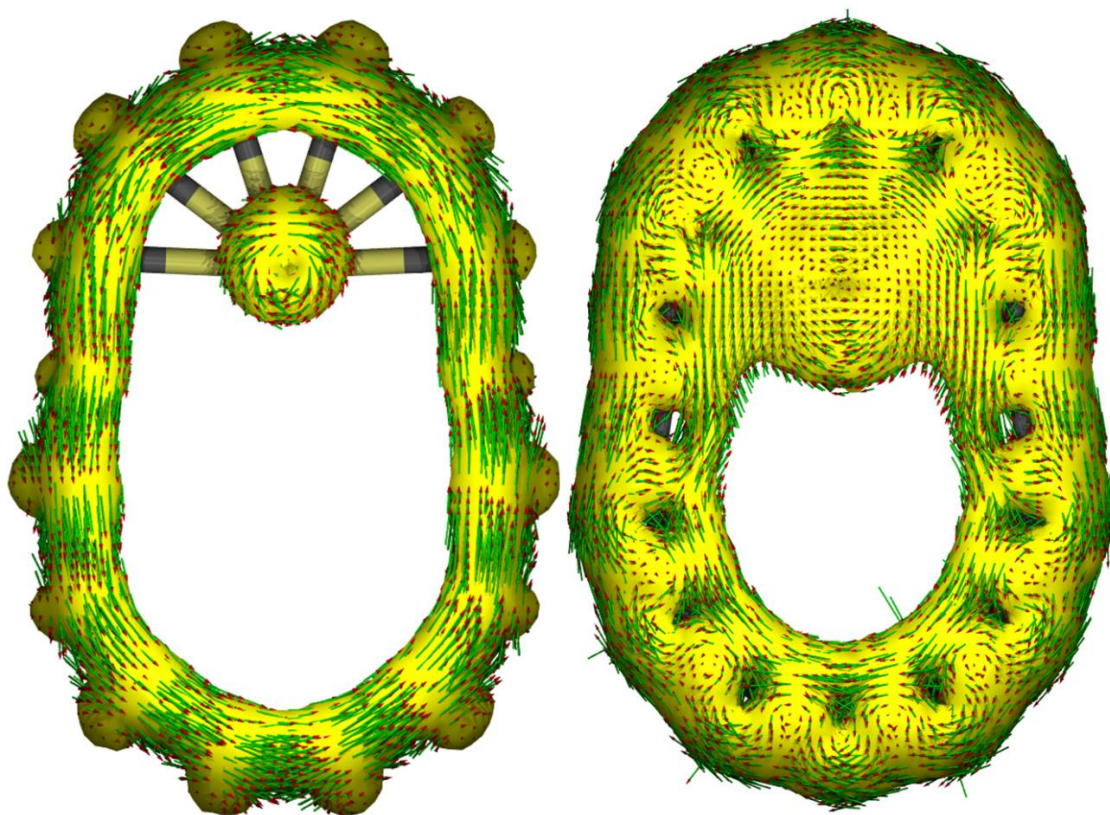

**TiC<sub>16</sub>: (ECP10MDF basis set for Ti)**

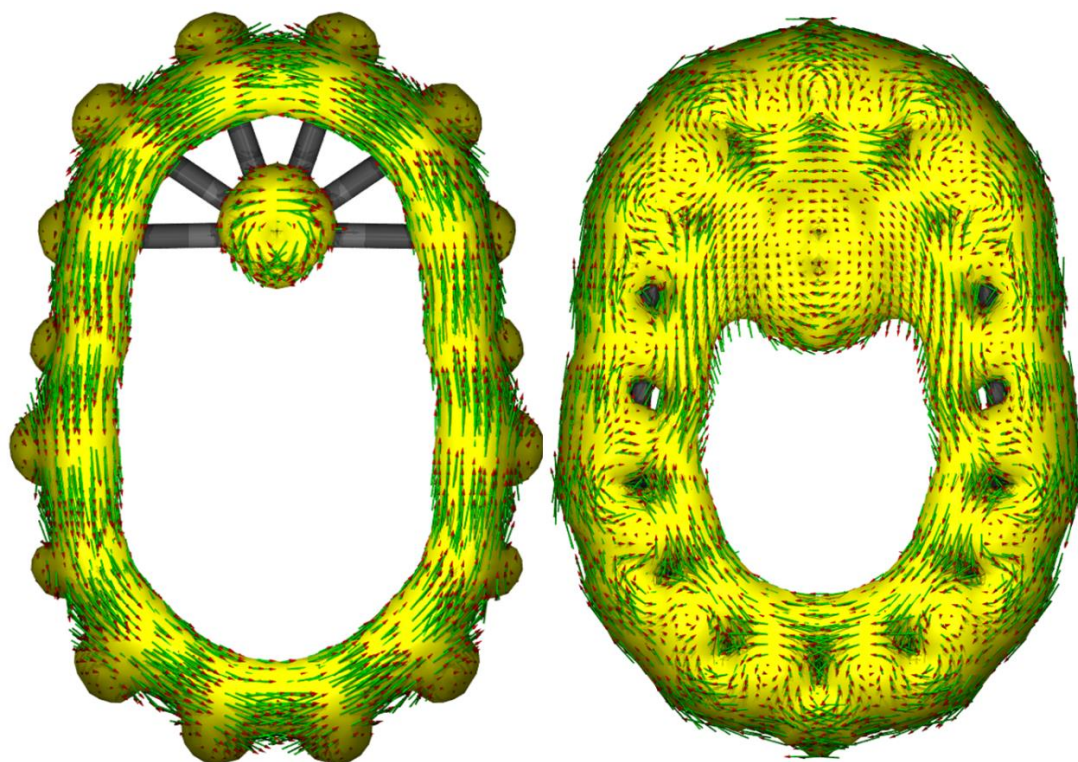

**VC<sub>16</sub>: (ECP10MDF basis set for V)**

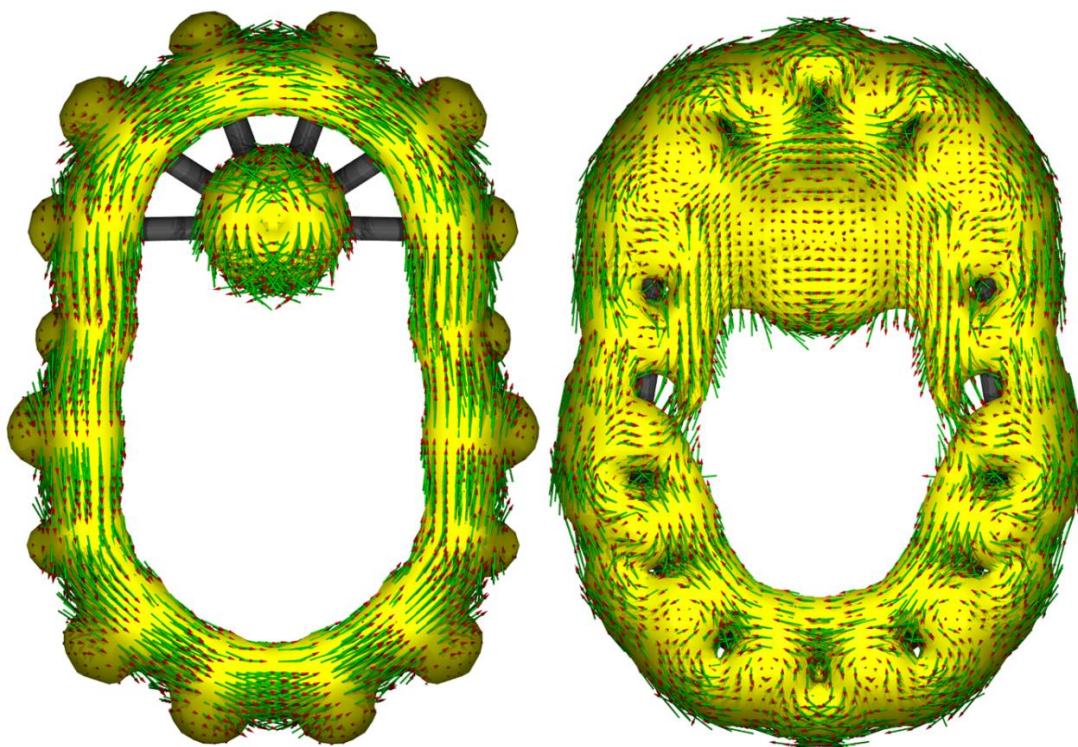

## Cartesian Coordinates (Angstrom) of DFT-Optimized Structures:

Cyclo[16]carbon (in MN15/def2-TZVP level of theory)

0 1

|   |             |             |            |
|---|-------------|-------------|------------|
| C | 0.60964800  | 3.25596700  | 0.00000000 |
| C | 1.87123000  | 2.73340200  | 0.00000000 |
| C | 2.73340200  | 1.87123000  | 0.00000000 |
| C | 3.25596700  | 0.60964800  | 0.00000000 |
| C | 3.25596700  | -0.60964800 | 0.00000000 |
| C | 2.73340200  | -1.87123000 | 0.00000000 |
| C | 1.87123000  | -2.73340200 | 0.00000000 |
| C | 0.60964800  | -3.25596700 | 0.00000000 |
| C | -0.60964800 | -3.25596700 | 0.00000000 |
| C | -1.87123000 | -2.73340200 | 0.00000000 |
| C | -2.73340200 | -1.87123000 | 0.00000000 |
| C | -0.60964800 | 3.25596700  | 0.00000000 |
| C | -2.73340200 | 1.87123000  | 0.00000000 |
| C | -1.87123000 | 2.73340200  | 0.00000000 |
| C | -3.25596700 | -0.60964800 | 0.00000000 |
| C | -3.25596700 | 0.60964800  | 0.00000000 |

CaC<sub>16</sub> singlet (in MN15/def2-TZVP level of theory)

0 1

|    |             |             |            |
|----|-------------|-------------|------------|
| C  | -2.78158000 | -0.87086400 | 0.00000000 |
| C  | -2.72498800 | 0.44414500  | 0.00000000 |
| C  | -2.40676400 | 1.67832200  | 0.00000000 |
| C  | -1.71825200 | 2.79804900  | 0.00000000 |
| C  | -0.59580500 | 3.42957200  | 0.00000000 |
| C  | 0.72371600  | 3.31858400  | 0.00000000 |
| C  | 1.89172600  | 2.81572600  | 0.00000000 |
| C  | 2.49468500  | 1.60068100  | 0.00000000 |
| C  | 2.79052900  | 0.39398000  | 0.00000000 |
| C  | 2.81469600  | -0.95969900 | 0.00000000 |
| C  | 2.47327700  | -2.14183500 | 0.00000000 |
| C  | -2.66525000 | -2.12562300 | 0.00000000 |
| C  | -0.77709200 | -3.85092900 | 0.00000000 |
| C  | -1.79022000 | -3.12886700 | 0.00000000 |
| C  | 1.70446100  | -3.25589000 | 0.00000000 |
| C  | 0.56685900  | -3.73011300 | 0.00000000 |
| Ca | 0.00000000  | 1.07542800  | 0.00000000 |

CaC<sub>16</sub> triplet (in MN15/def2-TZVP level of theory)

0 3

|    |             |             |            |
|----|-------------|-------------|------------|
| C  | -2.82900500 | -0.92476600 | 0.00000000 |
| C  | -2.79009200 | 0.40439100  | 0.00000000 |
| C  | -2.50111600 | 1.63463800  | 0.00000000 |
| C  | -1.79732800 | 2.75526900  | 0.00000000 |
| C  | -0.68058600 | 3.37997700  | 0.00000000 |
| C  | 0.63613700  | 3.39340100  | 0.00000000 |
| C  | 1.76330200  | 2.78707900  | 0.00000000 |
| C  | 2.48519500  | 1.67858300  | 0.00000000 |
| C  | 2.78654200  | 0.45074600  | 0.00000000 |
| C  | 2.83338300  | -0.87774600 | 0.00000000 |
| C  | 2.54794500  | -2.09049500 | 0.00000000 |
| C  | -2.53159500 | -2.13413500 | 0.00000000 |
| C  | -0.65001800 | -3.79603300 | 0.00000000 |
| C  | -1.74164400 | -3.21434100 | 0.00000000 |
| C  | 1.77512300  | -3.18252000 | 0.00000000 |
| C  | 0.69375800  | -3.78342200 | 0.00000000 |
| Ca | 0.00000000  | 1.05581200  | 0.00000000 |

ScC<sub>16</sub> (in MN15/def2-TZVP level of theory)

0 2

|    |             |             |             |
|----|-------------|-------------|-------------|
| C  | -1.01614200 | -2.50927000 | 0.00005300  |
| C  | 0.29990100  | -2.31636600 | -0.00000800 |
| C  | 1.57781900  | -2.27087400 | -0.00002700 |
| C  | 2.79842100  | -1.76090000 | -0.00002400 |
| C  | 3.49560600  | -0.65869100 | -0.00001200 |
| C  | 3.49524000  | 0.65952100  | 0.00002200  |
| C  | 2.79776700  | 1.76149600  | 0.00003200  |
| C  | 1.57694500  | 2.27102400  | 0.00001700  |
| C  | 0.29913100  | 2.31698600  | -0.00000700 |
| C  | -1.01697300 | 2.50934300  | -0.00007600 |
| C  | -2.25411600 | 2.37575700  | 0.00002300  |
| C  | -2.25332900 | -2.37602700 | -0.00001000 |
| C  | -4.07532300 | -0.66836700 | 0.00001700  |
| C  | -3.40669500 | -1.71333700 | 0.00000400  |
| C  | -3.40730600 | 1.71274500  | 0.00002100  |
| C  | -4.07549600 | 0.66749900  | 0.00002000  |
| Sc | 1.47558600  | -0.00015400 | -0.00001300 |

TiC<sub>16</sub> singlet (in UMN15/def2-TZVP level of theory)

0 1

|    |             |             |             |
|----|-------------|-------------|-------------|
| C  | -0.26849700 | 2.20141700  | 0.00299700  |
| C  | -1.54394100 | 2.20743400  | -0.00152700 |
| C  | -2.78133100 | 1.73870200  | -0.00399400 |
| C  | -3.50822200 | 0.65985600  | -0.00311600 |
| C  | -3.50790700 | -0.66041000 | -0.00338800 |
| C  | -2.78082600 | -1.73900500 | -0.00196800 |
| C  | -1.54331700 | -2.20768700 | 0.00133500  |
| C  | -0.26804100 | -2.20262300 | 0.00487900  |
| C  | 1.04796800  | -2.40423100 | 0.00078700  |
| C  | 2.28487800  | -2.30013800 | -0.00073000 |
| C  | 3.47050300  | -1.69406600 | -0.00223400 |
| C  | 1.04732400  | 2.40432900  | 0.00279600  |
| C  | 3.46980600  | 1.69434800  | -0.00036500 |
| C  | 2.28429800  | 2.30047300  | 0.00157200  |
| C  | 4.16534400  | -0.66806300 | -0.00297000 |
| C  | 4.16545600  | 0.66886900  | -0.00219900 |
| Ti | -1.56368100 | 0.00021700  | 0.00221600  |

TiC<sub>16</sub> triplet (in MN15/def2-TZVP level of theory)

0 3

|    |             |             |            |
|----|-------------|-------------|------------|
| C  | -2.21285900 | 0.26753800  | 0.00000000 |
| C  | -2.21007700 | 1.54282500  | 0.00000000 |
| C  | -1.73911400 | 2.77941000  | 0.00000000 |
| C  | -0.66048900 | 3.50595400  | 0.00000000 |
| C  | 0.66054200  | 3.50593600  | 0.00000000 |
| C  | 1.73914500  | 2.77936000  | 0.00000000 |
| C  | 2.21007500  | 1.54276100  | 0.00000000 |
| C  | 2.21280700  | 0.26747600  | 0.00000000 |
| C  | 2.41307700  | -1.04793600 | 0.00000000 |
| C  | 2.30462500  | -2.28499100 | 0.00000000 |
| C  | 1.69600500  | -3.46860100 | 0.00000000 |
| C  | -2.41305200 | -1.04788700 | 0.00000000 |
| C  | -1.69601900 | -3.46855900 | 0.00000000 |
| C  | -2.30462700 | -2.28494500 | 0.00000000 |
| C  | 0.66811100  | -4.16145500 | 0.00000000 |
| C  | -0.66814900 | -4.16145200 | 0.00000000 |
| Ti | 0.00000000  | 1.56397200  | 0.00000000 |

VC<sub>16</sub> doublet (in MN15/def2-TZVP level of theory)

0 2

|   |            |             |            |
|---|------------|-------------|------------|
| C | 2.61286000 | -2.19716200 | 0.00046200 |
| C | 1.39868200 | -2.45971700 | 0.00025800 |

|   |             |             |             |
|---|-------------|-------------|-------------|
| C | 0.07882400  | -2.36523500 | -0.00003900 |
| C | -1.17651800 | -2.24468800 | -0.00028700 |
| C | -2.44981400 | -1.87883600 | -0.00055600 |
| C | -3.36132300 | -0.96589200 | -0.00073400 |
| C | -3.57081200 | 0.34276300  | -0.00074300 |
| C | -2.99641800 | 1.51416700  | -0.00053300 |
| C | -1.82203600 | 2.11717100  | -0.00017500 |
| C | -0.53791300 | 2.13810100  | 0.00018500  |
| C | 0.76224100  | 2.41017800  | 0.00039100  |
| C | 3.73166500  | -1.47911800 | 0.00062600  |
| C | 4.08082300  | 0.98601900  | 0.00056400  |
| C | 4.22166200  | -0.33837100 | 0.00062700  |
| C | 2.00701300  | 2.40236300  | 0.00043000  |
| C | 3.23044800  | 1.89283800  | 0.00049000  |
| V | -1.61983900 | 0.03271800  | -0.00025100 |

VC<sub>16</sub> quartet (in MN15/def2-TZVP level of theory)

0 4

|   |             |             |            |
|---|-------------|-------------|------------|
| C | -2.16917900 | 0.24733700  | 0.00000000 |
| C | -2.16772100 | 1.52081700  | 0.00000000 |
| C | -1.71025100 | 2.76400600  | 0.00000000 |
| C | -0.65884200 | 3.52296600  | 0.00000000 |
| C | 0.65809700  | 3.52329200  | 0.00000000 |
| C | 1.70981200  | 2.76475500  | 0.00000000 |
| C | 2.16745600  | 1.52164300  | 0.00000000 |
| C | 2.16884800  | 0.24812200  | 0.00000000 |
| C | 2.37121300  | -1.06544200 | 0.00000000 |
| C | 2.27498000  | -2.30347900 | 0.00000000 |
| C | 1.68931100  | -3.49762600 | 0.00000000 |
| C | -2.37130200 | -1.06626000 | 0.00000000 |
| C | -1.68877200 | -3.49833000 | 0.00000000 |
| C | -2.27461600 | -2.30425200 | 0.00000000 |
| C | 0.66810200  | -4.20121800 | 0.00000000 |
| C | -0.66713800 | -4.20129300 | 0.00000000 |
| V | 0.00000000  | 1.57172900  | 0.00000000 |

CeC<sub>16</sub> singlet (in MN15/def2-TZVP ~ ECP28MWB level of theory)

0 1

|   |             |            |             |
|---|-------------|------------|-------------|
| C | 1.68869939  | 2.47696339 | -0.00006073 |
| C | 0.41012226  | 2.61492330 | 0.00025965  |
| C | -0.88095500 | 2.54437509 | 0.00032361  |
| C | -2.12161861 | 2.15856546 | 0.00023934  |

|    |             |             |             |
|----|-------------|-------------|-------------|
| C  | -2.97740324 | 1.18366337  | 0.00000546  |
| C  | -3.29897583 | -0.07546433 | -0.00010621 |
| C  | -2.90416947 | -1.31465230 | -0.00037708 |
| C  | -1.98465841 | -2.22478883 | -0.00009745 |
| C  | -0.73159034 | -2.58775443 | -0.00012043 |
| C  | 0.55082436  | -2.59721106 | 0.00021360  |
| C  | 1.84034724  | -2.44544401 | 0.00026820  |
| C  | 2.93111450  | 2.13879548  | -0.00042228 |
| C  | 4.38931636  | 0.07312308  | -0.00036322 |
| C  | 3.84368029  | 1.24567311  | -0.00051538 |
| C  | 3.05709589  | -2.07018387 | 0.00015171  |
| C  | 3.93260748  | -1.11990837 | -0.00015914 |
| Ce | -0.80114864 | -0.00006984 | 0.00007866  |

CeC<sub>16</sub> triplet (in MN15/def2-TZVP ~ ECP28MWB level of theory)

0 3

|    |             |             |             |
|----|-------------|-------------|-------------|
| C  | -1.65626700 | 2.57428600  | -0.00027200 |
| C  | -0.41821600 | 2.79540000  | -0.00049800 |
| C  | 0.90190800  | 2.75640300  | -0.00054800 |
| C  | 2.07454700  | 2.25567600  | -0.00067100 |
| C  | 2.96390400  | 1.28924900  | -0.00074700 |
| C  | 3.22910400  | 0.02500600  | -0.00074700 |
| C  | 2.88250700  | -1.23577800 | -0.00074500 |
| C  | 2.01089000  | -2.18436900 | -0.00066300 |
| C  | 0.77898600  | -2.63441400 | -0.00057600 |
| C  | -0.48828600 | -2.72079400 | -0.00047100 |
| C  | -1.79818900 | -2.59727200 | -0.00035400 |
| C  | -2.88127700 | 2.07429300  | -0.00023000 |
| C  | -4.23964100 | -0.03181100 | -0.00014200 |
| C  | -3.78427900 | 1.21433200  | -0.00014800 |
| C  | -2.98499700 | -2.19018500 | -0.00026100 |
| C  | -3.89294300 | -1.23100600 | -0.00017500 |
| Ce | 0.73132400  | 0.07696100  | -0.00048900 |

UC<sub>16</sub> (in MN15/def2-TZVP ~ ECP60MWB level of theory)

0 3

|   |             |             |            |
|---|-------------|-------------|------------|
| C | -2.47707300 | -0.65472000 | 0.00000000 |
| C | -2.51824000 | 0.63911500  | 0.00000000 |
| C | -2.17240500 | 1.88810000  | 0.00000000 |
| C | -1.26054300 | 2.81892400  | 0.00000000 |
| C | 0.00028300  | 3.14901800  | 0.00000000 |
| C | 1.26105500  | 2.81872500  | 0.00000000 |



|   |             |             |            |
|---|-------------|-------------|------------|
| C | 2.17277000  | 1.88775800  | 0.00000000 |
| C | 2.51841300  | 0.63871900  | 0.00000000 |
| C | 2.47704900  | -0.65510700 | 0.00000000 |
| C | 2.37615300  | -1.93962100 | 0.00000000 |
| C | 2.04069400  | -3.17631200 | 0.00000000 |
| C | -2.37634400 | -1.93924500 | 0.00000000 |
| C | -1.19599300 | -4.13887600 | 0.00000000 |
| C | -2.04107200 | -3.17599000 | 0.00000000 |
| C | 1.19546200  | -4.13906900 | 0.00000000 |
| C | -0.00030100 | -4.60503100 | 0.00000000 |
| U | 0.00009100  | 0.76126900  | 0.00000000 |
